# Supplementary material for: Global Gradient Algorithm Extension to Distributed Pressure Driven Pipe Demand Model
Source: Springer Nature journal article supplement (doi:10.1007/s11269-018-2174-3), 2019-02-19
Supplement: MOESM1 [file 16489854]

Table 2: Apulian WDN data

| Pipe | Length       | Diameter      | PDemand                       | Node      | NDemand                    | Elevation    |
|------|--------------|---------------|-------------------------------|-----------|----------------------------|--------------|
| ID   | ( <i>m</i> ) | ( <i>mm</i> ) | $\left(\frac{l}{s\ m}\right)$ | <i>ID</i> | $\left(\frac{l}{s}\right)$ | ( <i>m</i> ) |
| 1    | 349          | 327           | 0.0164                        | 1         | 0                          | 6.4          |
| 2    | 956          | 290           | 0.0162                        | 2         | 0                          | 7            |
| 3    | 483          | 100           | 0.0161                        | 3         | 0                          | 6            |
| 4    | 401          | 290           | 0.0162                        | 4         | 0                          | 8.4          |
| 5    | 792          | 100           | 0.0163                        | 5         | 0                          | 7.4          |
| 6    | 404          | 368           | 0.0163                        | 6         | 0                          | 9            |
| 7    | 391          | 327           | 0.0161                        | 7         | 0                          | 9.1          |
| 8    | 482          | 100           | 0.0162                        | 8         | 0                          | 8.4          |
| 9    | 934          | 100           | .01626                        | 9         | 0                          | 6.4          |
| 10   | 431          | 184           | 0.0162                        | 10        | 0                          | 10.5         |
| 11   | 513          | 100           | 0.0162                        | 11        | 0                          | 9.6          |
| 12   | 428          | 184           | 0.0163                        | 12        | 0                          | 11.7         |
| 13   | 419          | 100           | 0.0162                        | 13        | 0                          | 12.3         |
| 14   | 1023         | 100           | 0.0259                        | 14        | 0                          | 10.6         |
| 15   | 455          | 164           | 0.0382                        | 15        | 0                          | 10.1         |
| 16   | 183          | 290           | 0.0164                        | 16        | 0                          | 9.5          |
| 17   | 221          | 290           | 0.0163                        | 17        | 0                          | 10.2         |
| 18   | 584          | 164           | 0.0163                        | 18        | 0                          | 9.6          |
| 19   | 452          | 229           | 0.0162                        | 19        | 0                          | 9.1          |
| 20   | 795          | 100           | 0.0162                        | 20        | 0                          | 13.9         |
| 21   | 718          | 100           | 0.0163                        | 21        | 0                          | 11.1         |
| 22   | 656          | 258           | 0.0163                        | 22        | 0                          | 11.4         |
| 23   | 166          | 100           | 0.0163                        | 23        | 0                          | 10           |
| 24   | 252          | 100           | 0.0163                        | 24        |                            | $H_0 = 36.4$ |
| 25   | 332          | 100           | 0.0163                        |           |                            |              |
| 26   | 500          | 204           | 0.0162                        |           |                            |              |

---

|    |    |     |     |        |
|----|----|-----|-----|--------|
| 1  |    |     |     |        |
| 2  | 27 | 580 | 164 | 0.0162 |
| 3  |    |     |     |        |
| 4  | 28 | 843 | 100 | 0.0193 |
| 5  |    |     |     |        |
| 6  | 29 | 793 | 100 | 0.0163 |
| 7  |    |     |     |        |
| 8  | 30 | 846 | 184 | 0.0163 |
| 9  |    |     |     |        |
| 10 | 31 | 164 | 258 | 0.0165 |
| 11 |    |     |     |        |
| 12 | 32 | 428 | 100 | 0.0222 |
| 13 |    |     |     |        |
| 14 | 33 | 380 | 100 | 0.0163 |
| 15 |    |     |     |        |
| 16 | 34 | 158 | 368 | 0      |

---

15  
16  
17  
18  
19  
20  
21  
22  
23  
24  
25  
26  
27  
28  
29  
30  
31  
32  
33  
34  
35  
36  
37  
38  
39  
40  
41  
42  
43  
44  
45  
46  
47  
48  
49  
50  
51  
52  
53  
54  
55  
56  
57  
58  
59  
60  
61  
62  
63  
64  
65

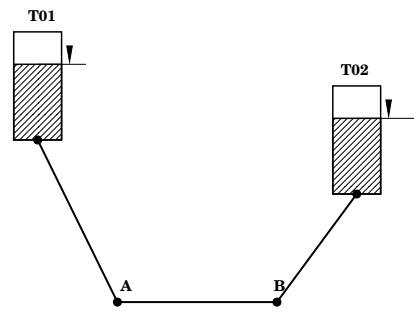

**Fig. 8** Network scheme in simplify case study. Two tanks connected with three pipe. Water demand is located only in then pipe *AB*

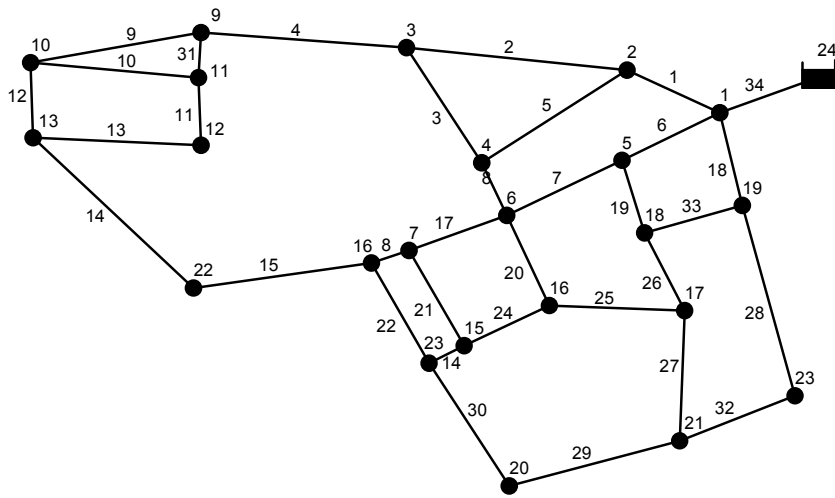

Fig. 9 Apulian Network layout.

1  
2  
3  
4  
5  
6  
7  
8  
9  
10  
11  
12  
13  
14  
15  
16  
17  
18  
19  
20  
21  
22  
23  
24  
25  
26  
27  
28  
29  
30  
31  
32  
33  
34  
35  
36  
37  
38  
39  
40  
41  
42  
43  
44  
45  
46  
47  
48  
49  
50  
51  
52  
53  
54  
55  
56  
57  
58  
59  
60  
61  
62  
63  
64  
65
